# Supplementary material for: Nutrient Leaching from Compost: Implications for Bioretention and Other Green Stormwater Infrastructure
Source: Atypon-hosted journal article supplement (doi:10.1061/jswbay.0000821), 2017-03-06
Supplement: supplemental_data_jswbay.0000821_hurley.pdf [file supplemental_data_jswbay.0000821_hurley.pdf]

*ASCE Journal of Sustainable Water in the Built Environment*

**Nutrient Leaching from Compost: Laboratory Study with Implications for Bioretention and Other Green Stormwater Infrastructure**

Stephanie Hurley, Paliza Shrestha, and Amanda Cording

**DOI:** 10.1061/JSWBAY.0000821

**Supplemental Data**

Appendix S1 contains the means of ammonium ( $\text{nh}_4^+$ ), nitrate ( $\text{no}_3^-$ ), and phosphate ( $\text{po}_4^-$ ) concentrations ( $\mu\text{g l}^{-1}$ ) extracted from different samples at each saturation duration.

**SUPPLEMENTAL DATA**

**Appendix S1.** Means of Ammonium (NH<sub>4</sub><sup>+</sup>), Nitrate (NO<sub>3</sub><sup>-</sup>), and Phosphate (PO<sub>4</sub><sup>-</sup>) Concentrations (µg L<sup>-1</sup>) Extracted from Different Samples at Each Saturation Duration

| Saturation time (h) | Compost and compost-amended bioretention media sample | Parameter                     |    |                                |   |                                 |    |
|---------------------|-------------------------------------------------------|-------------------------------|----|--------------------------------|---|---------------------------------|----|
|                     |                                                       | Nitrate (µg L <sup>-1</sup> ) |    | Ammonium (µg L <sup>-1</sup> ) |   | Phosphate (µg L <sup>-1</sup> ) |    |
| 0 (10 mins)         | A                                                     | 2401                          | a  | 11700                          | b | 4586                            | a  |
| 0 (10 mins)         | B                                                     | 1092                          | b  | 11220                          | c | 3143                            | c  |
| 0 (10 mins)         | C                                                     | 197                           | c  | 2750                           | d | 2003                            | d  |
| 0 (10 mins)         | D                                                     | 185                           | c  | 17280                          | a | 3558                            | b  |
| 0 (10 mins)         | E                                                     | 193                           | c  | 677                            | e | 1519                            | e  |
| 0 (10 mins)         | F                                                     | 197                           | c  | 2724                           | d | 591                             | f  |
| 0 (10 mins)         | G                                                     | 65                            | d  | 118                            | f | 317                             | f  |
| 24                  | A                                                     | 2563                          | a  | 12000                          | b | 5615                            | a  |
| 24                  | B                                                     | 1215                          | b  | 11260                          | c | 3748                            | c  |
| 24                  | C                                                     | 216                           | de | 2618                           | d | 2918                            | d  |
| 24                  | D                                                     | 197                           | e  | 17240                          | a | 4371                            | b  |
| 24                  | E                                                     | 233                           | cd | 652                            | e | 1904                            | e  |
| 24                  | F                                                     | 258                           | c  | 3067                           | d | 1254                            | f  |
| 24                  | G                                                     | 67                            | f  | 114                            | f | 469                             | g  |
| 120                 | A                                                     | 4100                          | a  | 9633                           | b | 7528                            | a  |
| 120                 | B                                                     | 1526                          | b  | 9468                           | b | 4843                            | b  |
| 120                 | C                                                     | 423                           | d  | 1992                           | c | 4715                            | b  |
| 120                 | D                                                     | 215                           | f  | 13690                          | a | 7442                            | a  |
| 120                 | E                                                     | 743                           | c  | 435                            | d | 3518                            | c  |
| 120                 | F                                                     | 319                           | e  | 2934                           | c | 3273                            | c  |
| 120                 | G                                                     | 710                           | c  | 70                             | d | 809                             | d  |
| 240                 | A                                                     | 4233                          | a  | 8396                           | b | 8546                            | b  |
| 240                 | B                                                     | 1723                          | b  | 7857                           | c | 5999                            | cd |
| 240                 | C                                                     | 619                           | d  | 1723                           | e | 6633                            | c  |
| 240                 | D                                                     | 286                           | e  | 12530                          | a | 10135                           | a  |
| 240                 | E                                                     | 1458                          | b  | 254                            | f | 5411                            | d  |
| 240                 | F                                                     | 310                           | e  | 3140                           | d | 4034                            | e  |
| 240                 | G                                                     | 1200                          | c  | 99                             | f | 1109                            | f  |

Note: Different letters within each saturation time indicate significant differences among samples at  $\alpha=0.05$ .
